# Supplementary material for: Triglycine-Based Approach for Identifying the Substrate Recognition Site of an Enzyme
Source: Preprints.org preprint supplement (doi:10.20944/preprints201908.0126.v1), 2019-08-11
Supplement: Supplementary file 1 [file supplementary]

# Supplementary Data

## Triglycine-based approach for identifying the substrate recognition site of an enzyme

Ki Hyun Nam<sup>1,2,\*</sup>

<sup>1</sup> Division of Biotechnology, Korea University, Seoul 02481, Republic of Korea

<sup>2</sup> Institute of Life Science and Natural Resources, Korea University, Seoul 02481, Republic of Korea

\* Correspondence: structures@korea.ac.kr; Tel.: 82-10-5208-5730 (N.K.H.)

Received: date; Accepted: date; Published: date

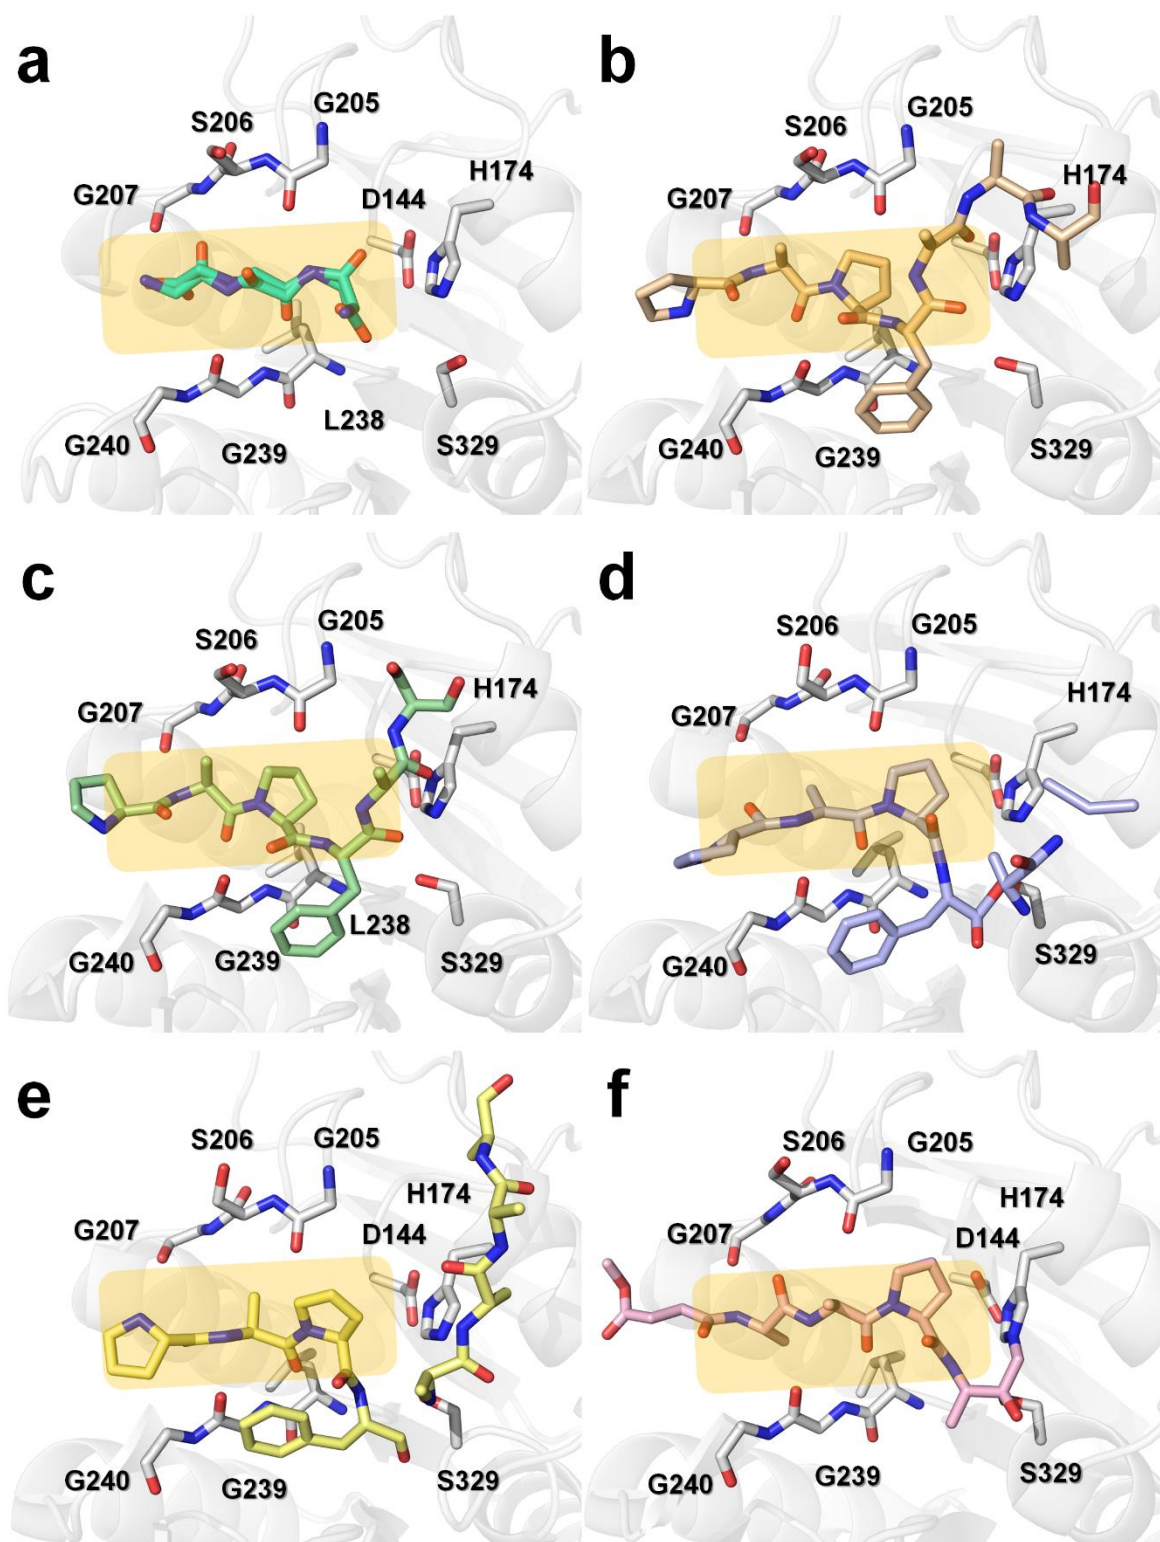

**Figure S1.** Comparison of substrate binding site of PaProK complexed with (a) triglycine or peptide based inhibitors from (b) PaProK-1P7V, (c) PaProK-1P7W, (d) PaProK-1PEK, (e) PaProK-1PFG and (f) PaProK-3PPK. The transparent box in orange indicates substrate binding site.
